# Supplementary material
Source: Springer Nature journal article supplement (https://www.springermedizin.de/resource/supplementary/13054_2012_513_MOESM2_ESM.pdf/9708706)

# Ventilation

Non Ventilation

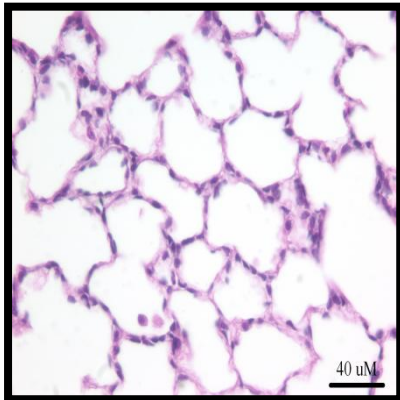

Saline

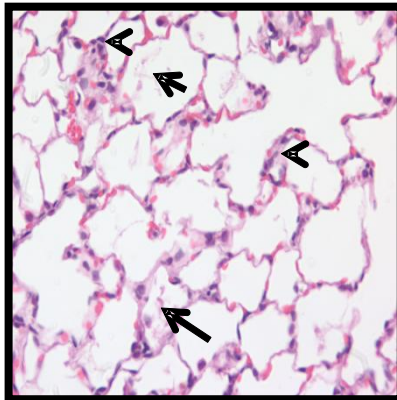

GABA

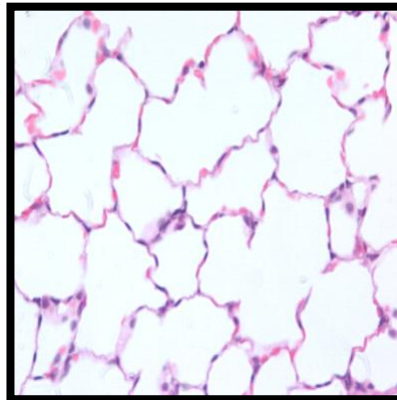

GABA+Bicuculline

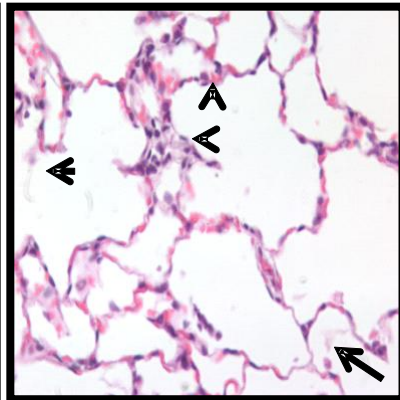

Supplement: MOESM2 [file 9708706]
